# Supplementary material
Source: PubMed Central journal article supplement (PMC7983509)
Supplement: sj-pdf-1-jcb-10.1177_0271678X20928147.pdf [file sj-pdf-1-jcb-10.1177_0271678X20928147.pdf]

Supplementary Figure 1. Western Blot of A) Miro1, B) TNFAIP2 and C) beta actin expression before (Neuron (-)) or after (Neuron (+)) oxidant injury with H<sub>2</sub>O<sub>2</sub> as well as after co-culture with MSC (CC). The blot was initially probed with antibody for Miro1, after that, the blot was stripped by the buffer and re-probed with TNFAIP2. The same blot was then stripped again by stripping buffer and then re-probed with beta actin.

A

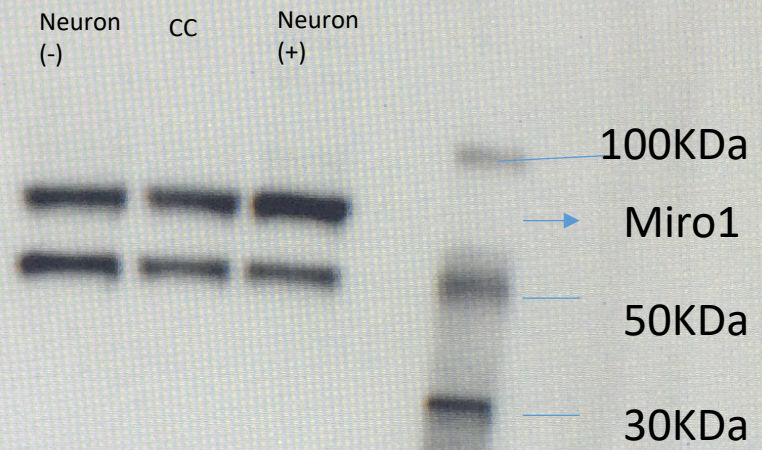

B

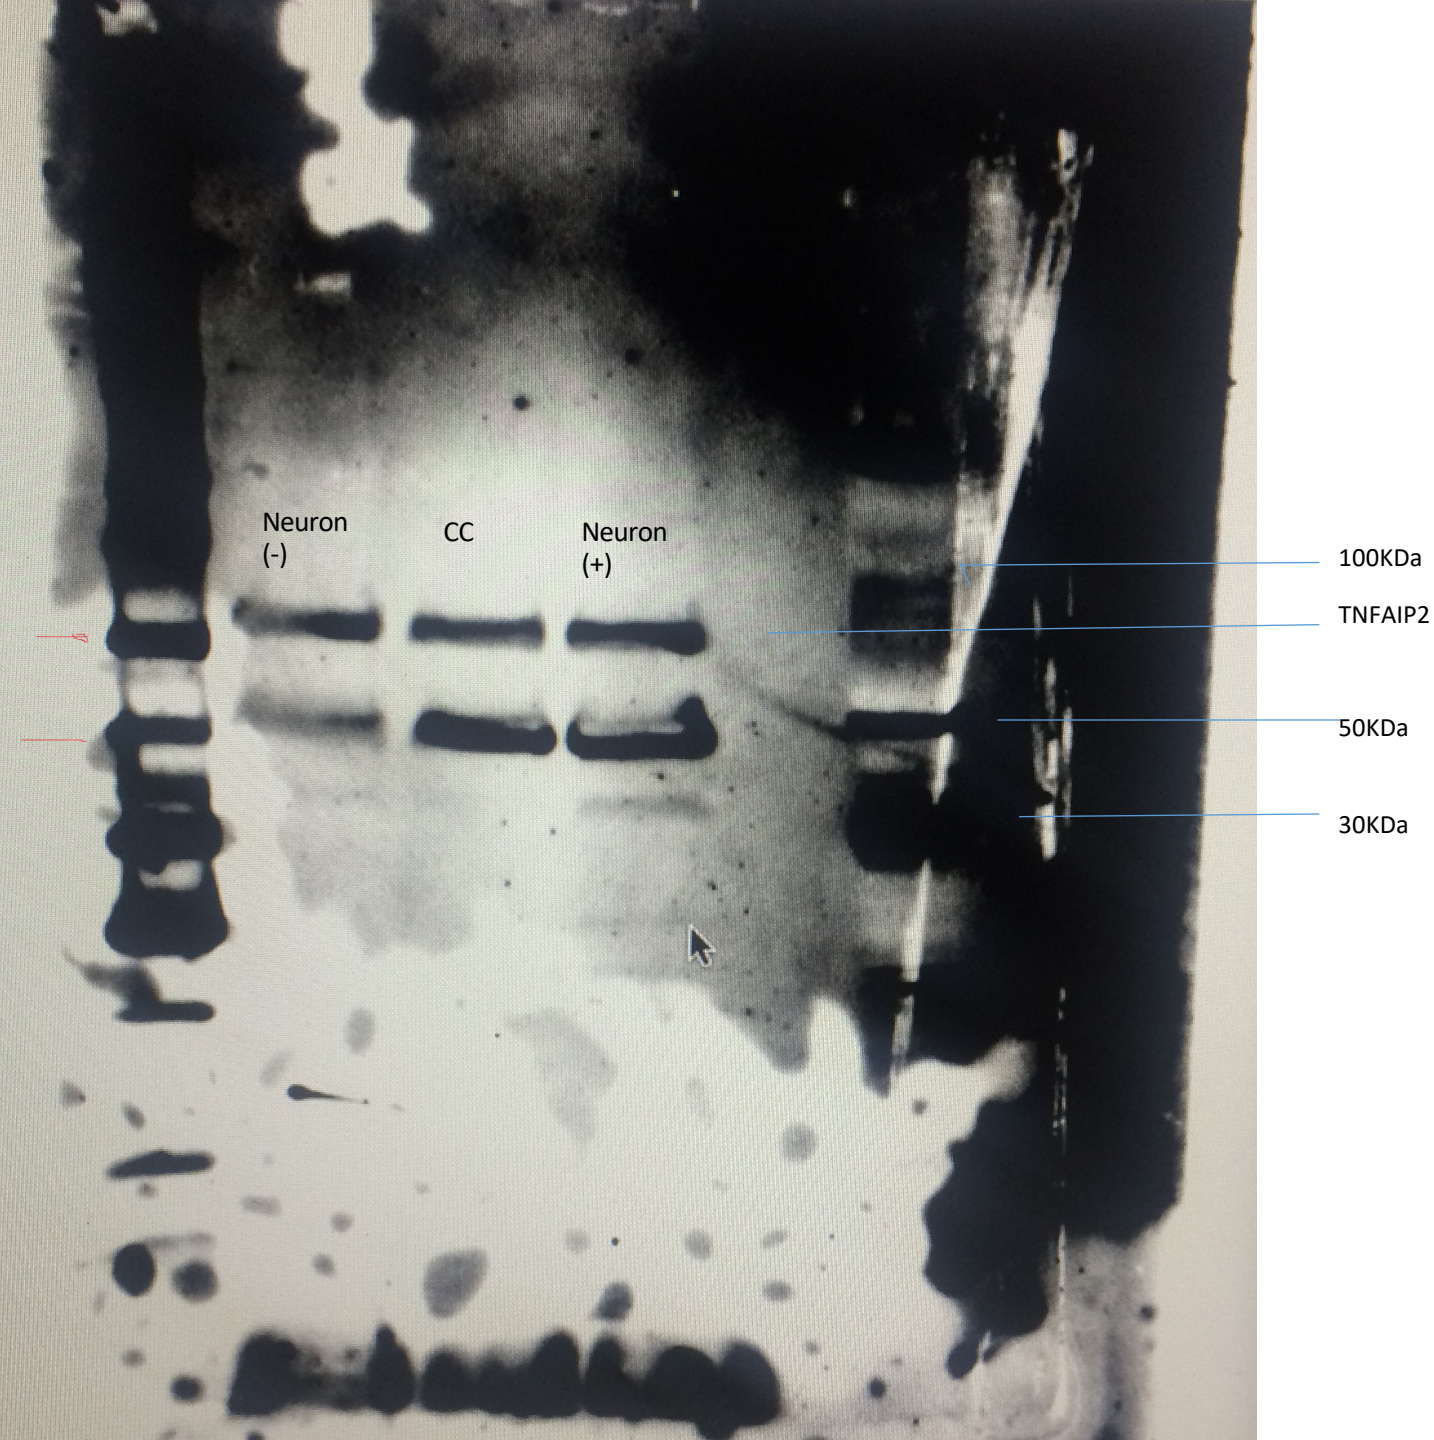

C

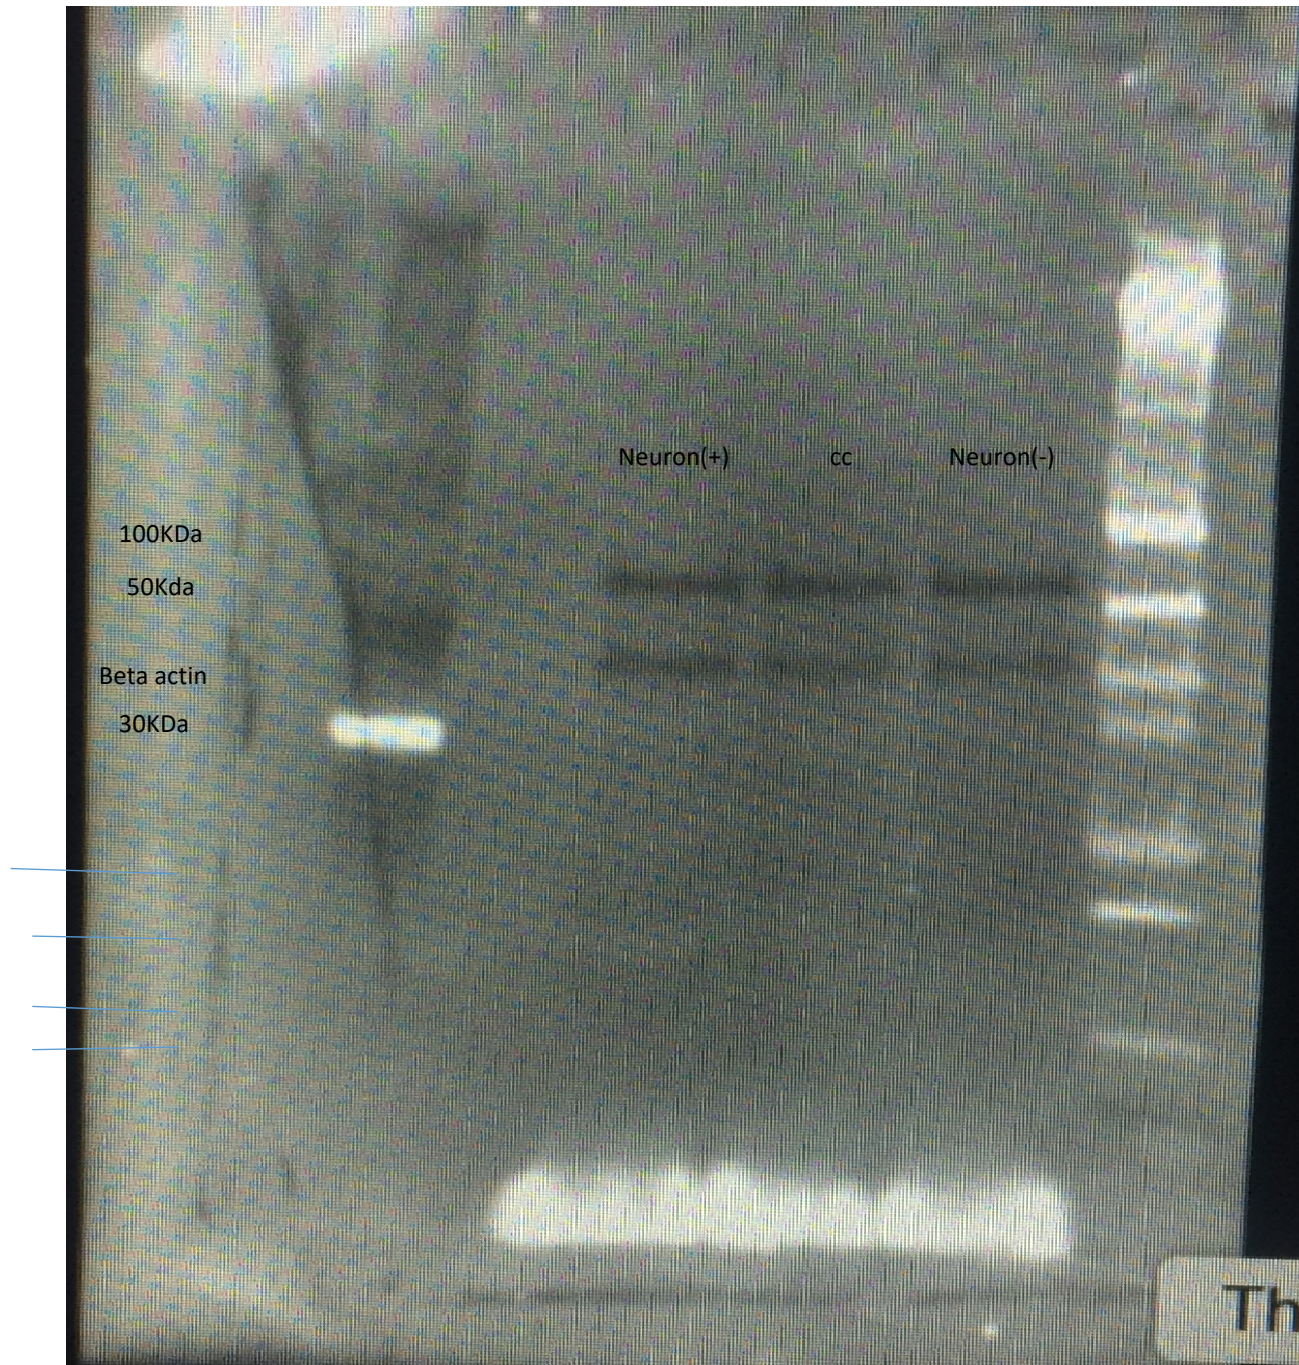

Th
